# Supplementary material for: Synergistic effects of Ni–Fe alloy catalysts on dry reforming of methane at low temperatures in an electric field
Source: Royal Society of Chemistry journal article supplement (doi:10.1039/d2ra05946k), 2022-01-01
Supplement: d2ra05946k1.pdf [file d2ra05946k1.pdf]

## Electronic supplementary information

### Synergistic effects of Ni-Fe alloy catalysts on dry reforming of methane at low temperatures in electric field

Ayaka Motomura<sup>a</sup>, Yuki Nakaya<sup>b</sup>, Sampson Clarence<sup>a</sup>, Takuma Higo<sup>a</sup>, Maki Torimoto<sup>a</sup>, Hideaki Tsuneki<sup>a</sup>, Shinya Furukawa<sup>b</sup> and Yasushi Sekine<sup>\*a</sup>

a. Department of Applied Chemistry, Waseda University, 3-4-1, Okubo, Shinjuku, Tokyo, 169-8555, Japan, \*E-mail: ysekine@waseda.jp

b. Institute for Catalysts, Hokkaido University, Kita 21 Nishi 10, Kita-ku, Sapporo, 001-0021, Japan.

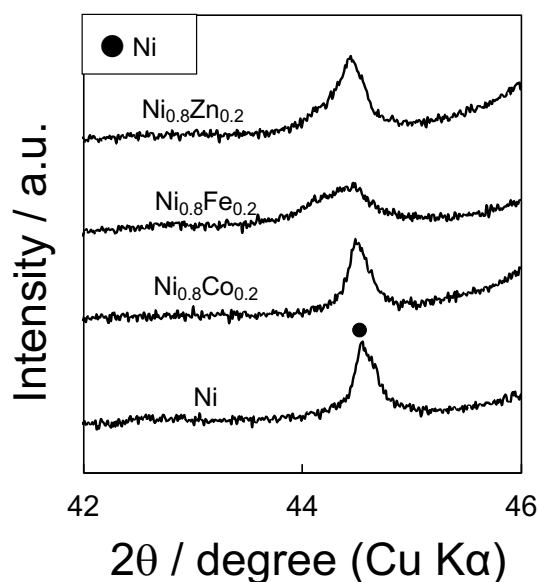

Figure S1 XRD patterns of 10wt%Ni, ( $\text{Ni}_{0.8}\text{M}_{0.2}$ ) (M = Co, Fe, Zn) / $\text{CeO}_2$ .

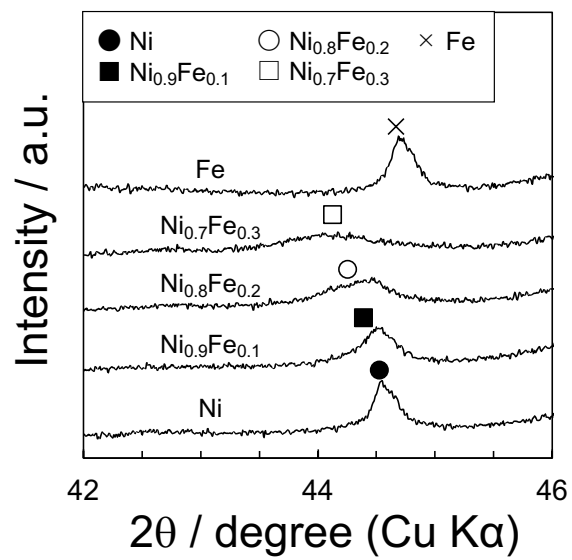

Figure S2 XRD patterns of 10wt%Ni, (Ni<sub>1-x</sub>M<sub>x</sub>) (X = 0.1, 0.2, 0.3 and only Fe) /CeO<sub>2</sub>.

## Experimental results

Table S1 Catalytic activity of 10wt%Ni, (Ni<sub>0.8</sub>M<sub>0.2</sub>) (M = Co, Zn), (Ni<sub>1-x</sub>Fe<sub>x</sub>) (x = 0.1, 0.2, 0.3)/CeO<sub>2</sub>.

Table S1. Catalytic activities of DRM with or without EF

(a) At 673 K with/without EF for the reaction rate and H<sub>2</sub>/CO ratio.

| Catalyst                            | Without EF (673 K)                                                                             |                                                   |                    | With EF (673 K, 10 mA)                                                                         |                    |
|-------------------------------------|------------------------------------------------------------------------------------------------|---------------------------------------------------|--------------------|------------------------------------------------------------------------------------------------|--------------------|
|                                     | Reaction rate<br>of CH <sub>4</sub> /<br>mmol h <sup>-1</sup><br>g <sub>Ni</sub> <sup>-1</sup> | Amount of<br>carbon<br>deposition<br>/ g-C/g-cat. | H <sub>2</sub> /CO | Reaction rate<br>of CH <sub>4</sub> /<br>mmol h <sup>-1</sup><br>g <sub>Ni</sub> <sup>-1</sup> | H <sub>2</sub> /CO |
|                                     | Ni                                                                                             | 129.3                                             | 0.141              | 0.50                                                                                           | 124.8              |
| Ni <sub>0.8</sub> Co <sub>0.2</sub> | 146.6                                                                                          | 0.079                                             | 0.49               | 140.0                                                                                          | 0.48               |
| Ni <sub>0.9</sub> Fe <sub>0.1</sub> | 109.5                                                                                          | 0.173                                             | 0.49               | 103.5                                                                                          | 0.51               |
| Ni <sub>0.8</sub> Fe <sub>0.2</sub> | 91.5                                                                                           | 0.009                                             | 0.38               | 78.2                                                                                           | 0.37               |
| Ni <sub>0.7</sub> Fe <sub>0.3</sub> | 14.2                                                                                           | 0.006                                             | 0.17               | 14.1                                                                                           | 0.17               |
| Ni <sub>0.8</sub> Zn <sub>0.2</sub> | 85.9                                                                                           | 0.021                                             | 0.35               | 90.1                                                                                           | 0.38               |

(b) At 473 K with/without EF for the reaction rate and H<sub>2</sub>/CO ratio.

| Catalyst                            | Without EF (473 K)                                                                             |                    | With EF (473 K, 10 mA)                                                                         |                                              |                                                   |                    |
|-------------------------------------|------------------------------------------------------------------------------------------------|--------------------|------------------------------------------------------------------------------------------------|----------------------------------------------|---------------------------------------------------|--------------------|
|                                     | Reaction rate<br>of CH <sub>4</sub> /<br>mmol h <sup>-1</sup><br>g <sub>Ni</sub> <sup>-1</sup> | H <sub>2</sub> /CO | Reaction rate<br>of CH <sub>4</sub> /<br>mmol h <sup>-1</sup><br>g <sub>Ni</sub> <sup>-1</sup> | Activity/<br>kWh kg-<br>syngas <sup>-1</sup> | Amount of<br>carbon<br>deposition<br>/ g-C/g-cat. | H <sub>2</sub> /CO |
|                                     | Ni                                                                                             | 0.1                | 0                                                                                              | 20.8                                         | 1.94                                              | 0.035              |
| Ni <sub>0.8</sub> Co <sub>0.2</sub> | 0.2                                                                                            | 0                  | 54.8                                                                                           | 1.71                                         | 0.024                                             | 0.77               |
| Ni <sub>0.9</sub> Fe <sub>0.1</sub> | 0.3                                                                                            | 0                  | 112.2                                                                                          | 1.67                                         | 0.021                                             | 0.81               |
| Ni <sub>0.8</sub> Fe <sub>0.2</sub> | 0.4                                                                                            | 0                  | 174.4                                                                                          | 1.43                                         | 0.015                                             | 0.82               |
| Ni <sub>0.7</sub> Fe <sub>0.3</sub> | 0.6                                                                                            | 0                  | 0.1                                                                                            | 29.0                                         | 0.006                                             | 0.13               |
| Ni <sub>0.8</sub> Zn <sub>0.2</sub> | 0.3                                                                                            | 0                  | 77.7                                                                                           | 1.42                                         | 0.022                                             | 0.75               |

(c) At 673 K with/without EF for the conversion and yield.

| Catalyst                            | Without EF (673 K) |                   |                |             | With EF (673 K, 10 mA) |                   |                |             |
|-------------------------------------|--------------------|-------------------|----------------|-------------|------------------------|-------------------|----------------|-------------|
|                                     | CH <sub>4</sub>    | CO <sub>2</sub>   | H <sub>2</sub> | CO          | CH <sub>4</sub>        | CO <sub>2</sub>   | H <sub>2</sub> | CO          |
|                                     | conversion<br>/ %  | conversion<br>/ % | yield/<br>%    | yield/<br>% | conversion/<br>%       | conversion<br>/ % | yield/<br>%    | yield/<br>% |
| Ni                                  | 4.8                | 7.7               | 3.2            | 4.8         | 4.9                    | 8.0               | 3.2            | 4.9         |
| Ni <sub>0.8</sub> Co <sub>0.2</sub> | 4.9                | 7.7               | 3.3            | 4.9         | 4.8                    | 7.8               | 3.1            | 4.8         |
| Ni <sub>0.9</sub> Fe <sub>0.1</sub> | 4.6                | 7.0               | 3.0            | 4.6         | 4.3                    | 6.7               | 2.9            | 4.3         |
| Ni <sub>0.8</sub> Fe <sub>0.2</sub> | 3.0                | 5.6               | 1.6            | 3.0         | 2.6                    | 5.0               | 1.3            | 2.6         |
| Ni <sub>0.7</sub> Fe <sub>0.3</sub> | 0.4                | 1.1               | 0.1            | 0.4         | 0.4                    | 1.1               | 0.1            | 0.4         |
| Ni <sub>0.8</sub> Zn <sub>0.2</sub> | 2.9                | 5.7               | 1.5            | 2.9         | 3.1                    | 5.7               | 1.7            | 3.1         |

(d) At 673 K with/without EF for the conversion and yield.

| Catalyst                            | Without EF (473 K) |                   |                |             | With EF (473 K, 10 mA) |                   |                |             |
|-------------------------------------|--------------------|-------------------|----------------|-------------|------------------------|-------------------|----------------|-------------|
|                                     | CH <sub>4</sub>    | CO <sub>2</sub>   | H <sub>2</sub> | CO          | CH <sub>4</sub>        | CO <sub>2</sub>   | H <sub>2</sub> | CO          |
|                                     | conversion<br>/ %  | conversion<br>/ % | yield/<br>%    | yield/<br>% | conversion<br>/ %      | conversion<br>/ % | yield/<br>%    | yield/<br>% |
| Ni                                  | 0.0                | 0.0               | 0.0            | 0.0         | 0.8                    | 1.2               | 0.7            | 0.8         |
| Ni <sub>0.8</sub> Co <sub>0.2</sub> | 0.0                | 0.0               | 0.0            | 0.0         | 1.9                    | 2.5               | 1.6            | 1.9         |
| Ni <sub>0.9</sub> Fe <sub>0.1</sub> | 0.0                | 0.0               | 0.0            | 0.0         | 4.3                    | 5.1               | 3.9            | 4.3         |
| Ni <sub>0.8</sub> Fe <sub>0.2</sub> | 0.0                | 0.0               | 0.0            | 0.0         | 6.0                    | 6.5               | 5.7            | 6.0         |
| Ni <sub>0.7</sub> Fe <sub>0.3</sub> | 0.0                | 0.1               | 0.0            | 0.0         | 0.0                    | 0.0               | 0.0            | 0.0         |
| Ni <sub>0.8</sub> Zn <sub>0.2</sub> | 0.0                | 0.0               | 0.0            | 0.0         | 4.9                    | 7.7               | 2.1            | 4.9         |

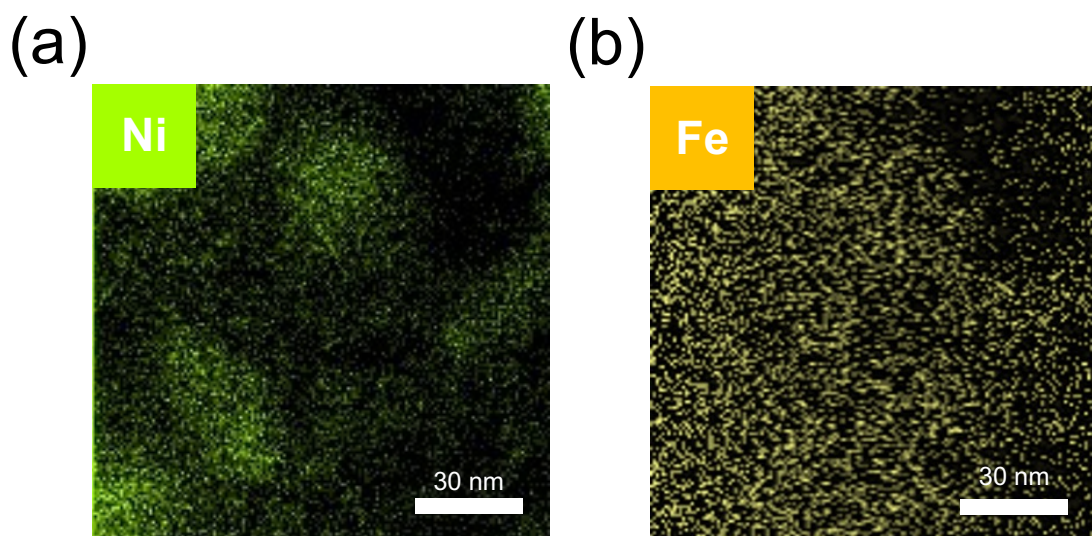

Figure S3 EDX mappings for 10wt%(Ni<sub>0.7</sub>Fe<sub>0.3</sub>)/CeO<sub>2</sub>.

#### Evaluation of adsorbed species on Ni, Ni<sub>0.8</sub>Fe<sub>0.2</sub>/CeO<sub>2</sub>

Figure S4 shows H<sub>2</sub>-TPD patterns of Ni, Ni<sub>0.8</sub>Fe<sub>0.2</sub>/CeO<sub>2</sub> extracted from H<sub>2</sub> mass signal. Temperature of H<sub>2</sub> desorption on Ni<sub>0.8</sub>Fe<sub>0.2</sub> shifted to the lower side by about 40 K rather than that of Ni. The desorption peak at temperatures among lower than 573 K is attributed to H<sub>2</sub> desorbed from the surface Ni particles.<sup>a, b</sup> This result demonstrates that Ni<sub>0.8</sub>Fe<sub>0.2</sub> has lower H<sub>2</sub> adsorption ability and weaker interaction of adsorbed H atoms than Ni-monometallic. In EF-assisted catalytic reaction, H atom adsorption energy effects on the surface proton migration and thus reactivity. Also, proper adsorption energy is required for high mobility and activity.<sup>c</sup> In view of this report, Ni<sub>0.8</sub>Fe<sub>0.2</sub> which shows high activity with EF is expected to have appropriate H atom adsorption ability and allow protons to migrate easily for achieving high catalytic activity.

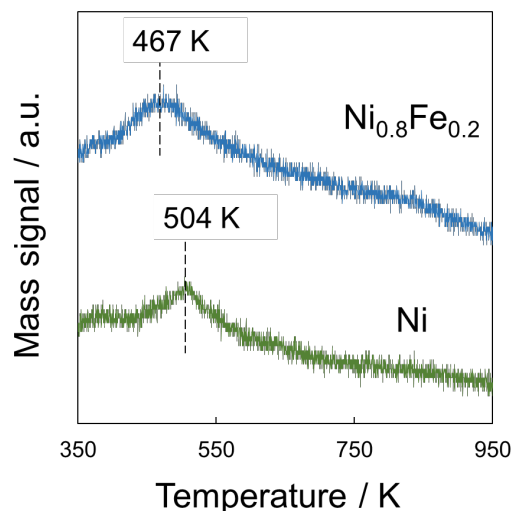

**Figure S4** H<sub>2</sub>-TPD patterns of 10wt%Ni, (Ni<sub>0.8</sub>Fe<sub>0.2</sub>)/CeO<sub>2</sub>.

Also, the number of adsorbed species is already known to play an important role in proton conduction *via* hydroxyl groups on the catalyst surface.<sup>24, d</sup> Because adsorbed species such as surface hydroxyl groups can be stable at low temperatures, EF application is the predominant result at the low temperature side. Contrary, at high temperatures, the effect of EF application is reduced, and the heat catalytic reaction becomes dominant because the adsorbed species are desorbed. Temperature variation tests using Ni, Ni<sub>0.8</sub>Fe<sub>0.2</sub>/CeO<sub>2</sub> were conducted to investigate the effects of temperature on activity and adsorbed species (results are depicted in Figures S5).

Although the temperature is reduced, the adsorbed species, which are carriers of proton conduction, do not desorb. Because the adsorption phenomenon is an exothermic reaction, the adsorbed species desorb gradually as the temperature is increased. Consequently, the influence of the state of the adsorbed species on the activity is visible from the temperature change test: for Ni, the processes of lowering and raising the catalyst bed temperature showed different behaviours. In the process of lowering the temperature, the activity decreased gradually, concomitantly with decreasing temperature. In the process of increasing the temperature from 373 K, the activity decreased significantly with increasing temperature. However, Ni<sub>0.8</sub>Fe<sub>0.2</sub> showed an almost identical trend at lower and higher temperatures. At temperatures higher than

473 K, the adsorbed species start to desorb, resulting in a marked decrease in activity and higher temperature dependence.

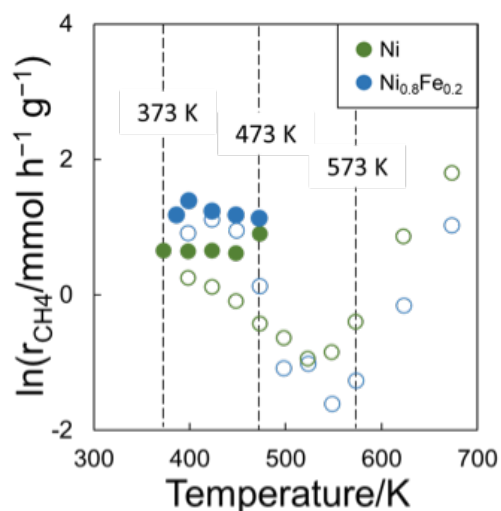

**Figure S5 Relationship between temperature and activity of 10wt%Ni, 10wt%(Ni<sub>0.8</sub>Fe<sub>0.2</sub>)/CeO<sub>2</sub> with application of 5 mA; 80 SCCM total flow rate (CH<sub>4</sub>: CO<sub>2</sub>: Ar = 1: 1: 6); open symbols represent the data with ramping temperatures, closed symbols represent the data with decreasing temperatures.**

- Z. Luo, Z. Zheng, L. Li, Y. Cui and C. Zhao, *ACS catal.*, 2017, 7, 8304-8313.
- S. Velu and S. K. Gangwal, *Solid State Ion.*, 2006, 177, 803-811.
- K. Murakami, Y. Mizutani, H. Sampei, A. Ishikawa, Y. Tanaka, S. Hayashi, S. Doi, T. Higo, H. Tsuneki, H. Nakai and Y. Sekine, *Phys. Chem. Chem. Phys.*, 2021, 23, 4509-4516.
- A. Takahashi, R. Inagaki, M. Torimoto, Y. Hisai, T. Matsuda, Q. Ma, J. G. Seo, T. Higo, H. Tsuneki, S. Ogo, T. Norby and Y. Sekine, *RSC Adv.*, 2020, 10, 14487-14492.
